# Supplementary material
Source: PubMed Central journal article supplement (PMC7873775)
Supplement: jama-e2027205-s001.pdf [file jama-e2027205-s001.pdf]

## Supplementary Online Content

Sillesen A-S, Vøgg O, Pihl C. Prevalence of bicuspid aortic valve and associated aortopathy in newborns in Copenhagen, Denmark. *JAMA*. doi:10.1001/jama.2020.27205

**eTable 1.** Echocardiographic Protocol in the CBHS

**eTable 2.** Views and Modalities Employed for the Quantitative Echocardiographic Parameters

**eTable 3.** Echocardiographic Parameters for BAV and Non-BAV Groups

**eFigure 1.** Schematic Illustration of BAV Subtypes, Classified According to Sievers and Schmidtke

**eFigure 2.** Flowchart for the Identification of Newborns With BAV on Transthoracic Echocardiography

**eFigure 3.** Overlapping Kernel Density Plots for the BAV (Red Line) and Control (Black Line) Groups

**eFigure 4.** Z scores for Ascending Aortic Dimensions and Main Pulmonary Artery Diameter in Newborns With BAV According to the Pediatric Heart Network Normal Echocardiogram Database

**eFigure 5.** Scatter Plots Displaying Ascending Aortic Diameter Expressed as Z score and the Peak Flow Velocity Across the Aortic Valve for Newborns in the BAV Group

**eReferences**

This supplementary material has been provided by the authors to give readers additional information about their work.

**eTable 1. Echocardiographic Protocol in the CBHS**

| View                          | M-mode       | 2D | Color Doppler | Pulsed-wave Doppler | Continuous-wave Doppler | Tissue Doppler |
|-------------------------------|--------------|----|---------------|---------------------|-------------------------|----------------|
| <i>Subxiphoid</i>             |              |    |               |                     |                         |                |
| Situs view                    |              | x  |               |                     |                         |                |
| Abdominal long axis: IVC      |              | x  |               |                     |                         |                |
| Atrial septum                 |              | x  | x             |                     |                         |                |
| Long axis: SVC-RA-IVC, LA     |              |    | x             |                     |                         |                |
| <i>Left parasternal</i>       |              |    |               |                     |                         |                |
| PLAX                          | x (AV, LA)   | x  | x             |                     |                         |                |
| PLAX with focus on aorta      |              | x  |               |                     |                         |                |
| PSAX aorta                    |              | x  | x             |                     |                         |                |
| PSAX pulmonary trunk          |              | x  | x             | x                   |                         |                |
| PSAX LV                       |              | x  |               |                     |                         |                |
| <i>Apical</i>                 |              |    |               |                     |                         |                |
| Coronary sinus view           |              | x  | x             |                     |                         |                |
| Four chamber view (LV center) |              | x  | x             | x                   |                         | x              |
| Four chamber view (RV center) | x<br>(TAPSE) | x  | x             | x                   | x                       |                |
| Five chamber view             |              | x  | x             | x (LVOT)            | x                       |                |
| <i>Suprasternal</i>           |              |    |               |                     |                         |                |
| Aortic arch                   |              | x  | x             |                     | x                       |                |

AV: aortic valve; IVC: inferior vena cava; LA: left atrium; LV: left ventricle; LVOT; left ventricular outflow tract; PLAX: parasternal long-axis; PSAX: parasternal short-axis; RA: right atrium; RV: right ventricle; SVC: superior vena cava; TAPSE: tricuspid annular plane systolic excursion.

**eTable 2. Views and Modalities Employed for the Quantitative Echocardiographic Parameters**

|                                                            | Parameter                                                           | View                        | Modality   | Timing       |
|------------------------------------------------------------|---------------------------------------------------------------------|-----------------------------|------------|--------------|
| Left ventricle and left ventricular outflow tract          | Interventricular septal end-diastolic thickness                     | Parasternal long-axis view  | 2D         | end-diastole |
|                                                            | Left ventricular posterior wall end-diastolic thickness             | Parasternal long-axis view  | 2D         | end-diastole |
|                                                            | Left ventricular end-diastolic diameter                             | Parasternal long-axis view  | 2D         | end-diastole |
|                                                            | Left ventricular end-systolic diameter                              | Parasternal long-axis view  | 2D         | end-systole  |
|                                                            | Ejection fraction                                                   | Parasternal long-axis view  | 2D         |              |
|                                                            | Fractional shortening                                               | Parasternal long-axis view  | 2D         |              |
|                                                            | Left ventricular outflow tract diameter                             | Parasternal long-axis view  | 2D         | mid-systole  |
|                                                            | Left ventricular outflow tract velocity time integral               | Apical 5-chamber view       | PW Doppler | systole      |
|                                                            | Left ventricular outflow tract max pressure gradient                | Apical 5-chamber view       | PW Doppler | systole      |
|                                                            | Left ventricular outflow tract mean pressure gradient               | Apical 5-chamber view       | PW Doppler | systole      |
|                                                            | Left ventricular outflow tract peak velocity                        | Apical 5-chamber view       | PW Doppler | systole      |
|                                                            | Left ventricular outflow tract mean velocity                        | Apical 5-chamber view       | PW Doppler | systole      |
| Aortic root, tubular ascending aorta, and descending aorta | Aortic valve annulus diameter                                       | Parasternal long-axis view  | 2D         | mid-systole  |
|                                                            | Sinuses of Valsalva diameter                                        | Parasternal long-axis view  | 2D         | mid-systole  |
|                                                            | Sinotubular junction diameter                                       | Parasternal long-axis view  | 2D         | mid-systole  |
|                                                            | Tubular ascending aortic diameter, 1cm from aortic valve annulus    | Parasternal long-axis view  | 2D         | mid-systole  |
|                                                            | Tubular ascending aortic diameter, widest part visualized           | Parasternal long-axis view  | 2D         | mid-systole  |
|                                                            | Aortic outflow* velocity time integral                              | Apical 5-chamber view       | CW Doppler | systole      |
|                                                            | Aortic outflow* peak velocity                                       | Apical 5-chamber view       | CW Doppler | systole      |
|                                                            | Aortic outflow* mean velocity                                       | Apical 5-chamber view       | CW Doppler | systole      |
|                                                            | Aortic outflow* max pressure gradient                               | Apical 5-chamber view       | CW Doppler | systole      |
|                                                            | Aortic outflow* mean pressure gradient                              | Apical 5-chamber view       | CW Doppler | systole      |
|                                                            | Descending aorta peak velocity                                      | Suprasternal view           | CW Doppler | systole      |
|                                                            | Descending aorta max pressure gradient                              | Suprasternal view           | CW Doppler | systole      |
| Main pulmonary artery                                      | Main pulmonary artery diameter, 0.5 cm from pulmonary valve annulus | Parasternal short-axis view | 2D         | mid-systole  |
|                                                            | Main pulmonary artery velocity time integral                        | Parasternal short-axis view | PW Doppler | systole      |
|                                                            | Main pulmonary artery flow peak velocity                            | Parasternal short-axis view | PW Doppler | systole      |
|                                                            | Main pulmonary artery flow mean velocity                            | Parasternal short-axis view | PW Doppler | systole      |
|                                                            | Main pulmonary artery flow max pressure gradient                    | Parasternal short-axis view | PW Doppler | systole      |
|                                                            | Main pulmonary artery flow mean pressure gradient                   | Parasternal short-axis view | PW Doppler | systole      |

All Doppler measurements were averaged over 3 cardiac cycles per view (if possible). All other measurements were obtained from 1 cardiac cycle.

\* aortic outflow i.e. flow across the aortic valve

**eTable 3. Echocardiographic Parameters for BAV and Non-BAV Groups**

| Echocardiographic parameters                              | BAV group<br><i>n</i> =191 <sup>(a)</sup> | Non-BAV group<br><i>n</i> =382 | Mean difference<br><i>(continuous)</i> | Absolute % difference<br><i>(dichotomous)</i> | 95% CI    | <i>p</i> -value |
|-----------------------------------------------------------|-------------------------------------------|--------------------------------|----------------------------------------|-----------------------------------------------|-----------|-----------------|
| <i>Left ventricle</i>                                     |                                           |                                |                                        |                                               |           |                 |
| Left ventricular end-diastolic diameter (mm (SD))         | 19.6 (1.7)                                | 19.4 (1.6)                     | 0.16                                   |                                               | -0.1; 0.4 | .29             |
| Left ventricular end-systolic diameter (mm (SD))          | 13.3 (1.4)                                | 13.1 (1.3)                     | 0.20                                   |                                               | -0.1; 0.4 | .12             |
| Ejection fraction (% (SD))                                | 63.0 (5.4)                                | 63.7 (5.3)                     | -0.70                                  |                                               | -1.7; 0.3 | .15             |
| <i>Aortic valve and aortic root</i>                       |                                           |                                |                                        |                                               |           |                 |
| AV annulus diameter (mm (SD))                             | 7.0 (0.7)                                 | 7.0 (0.6)                      | 0.02                                   |                                               | -0.1; 0.1 | .77             |
| Sinuses of Valsalva diameter (mm (SD))                    | 10.7 (1.3)                                | 10.3 (1.0)                     | 0.43                                   |                                               | 0.2; 0.6  | <.001*          |
| Sinotubular junction diameter (mm (SD))                   | 8.4 (1.1)                                 | 8.3 (0.8)                      | 0.12                                   |                                               | -0.1; 0.3 | .19             |
| Aortic valve area (mm <sup>2</sup> (SD))                  | 34.0 (8.6)                                | 34.5 (8.3)                     | -0.36                                  |                                               | -2.3; 1.6 | .72             |
| Aortic outflow mean velocity (m/s (SD))                   | 0.67 (0.16)                               | 0.61 (0.08)                    | 0.06                                   |                                               | 0.0; 0.1  | <.001*          |
| Aortic outflow peak velocity (m/s (SD))                   | 0.98 (0.22)                               | 0.89 (0.12)                    | 0.09                                   |                                               | 0.0; 0.1  | <.001*          |
| Aortic stenosis (n (%))                                   | 1 (0.5)                                   | 0 (0)                          |                                        | -                                             | -         | .33             |
| Aortic regurgitation (n (%))                              | 28 (14.7)                                 | 5 (1.3)                        |                                        | 13.4                                          | 7.8; 18.9 | <.001*          |
| <i>Tubular ascending aorta and descending aorta</i>       |                                           |                                |                                        |                                               |           |                 |
| Tubular ascending aortic diameter, 1 cm from AV (mm (SD)) | 9.8 (1.2)                                 | 9.4 (0.9)                      | 0.46                                   |                                               | 0.3; 0.7  | <.001*          |
| Tubular ascending aortic diameter, widest part (mm (SD))  | 10.7 (1.3)                                | 9.9 (1.0)                      | 0.81                                   |                                               | 0.6; 1.0  | <.001*          |
| Descending aortic flow peak velocity (m/s (SD))           | 1.31 (0.22)                               | 1.24 (0.19)                    | 0.08                                   |                                               | 0.0; 0.1  | .002*           |
| Coarctation (n (%))                                       | 3 (1.6)                                   | 0 (0)                          |                                        | -                                             | -         | .04             |
| <i>Other</i>                                              |                                           |                                |                                        |                                               |           |                 |
| Main pulmonary artery diameter (mm (SD))                  | 9.2 (1.1)                                 | 8.6 (1.0)                      | 0.59                                   |                                               | 0.4; 0.8  | <.001*          |
| Main pulmonary artery flow mean velocity (m/s (SD))       | 0.56 (0.09)                               | 0.58 (0.09)                    | -0.02                                  |                                               | 0.0; 0.1  | .006            |
| Ventricular septal defect (n (%))                         | 8 (4.2)                                   | 16 (4.2)                       |                                        | 0                                             | -3.5; 3.5 | 1               |

Bonferroni corrected statistically significant *p*-values are indicated with \*. Results from a sensitivity analysis, excluding all newborns with coexisting cardiac structural or functional abnormal findings (ventricular septal defect, coarctation, congenital aortic stenosis, reduced left ventricular systolic function requiring follow-up) showed no clinically important differences compared to results for the total cohort. AV: aortic valve; BAV: bicuspid aortic valve; CBHS: Copenhagen Baby Heart Study; CI: Confidence Interval; SD: Standard Deviation.

<sup>(a)</sup> Matching criteria for five newborns with BAV were not fulfilled and they were excluded (three newborns from twin pregnancies and two from single pregnancies; they all deviated considerably in gestational age, weight [2.1-2.9 kg and 4.0 kg] and/or age [15-47 days old] from average at time of examination).

**eFigure 1. Schematic Illustration of BAV Subtypes, Classified According to Sievers and Schmidtke<sup>1</sup>**

NL: non- and left-coronary sinuses; RL: right- and left-coronary sinuses; RN: right- and non-coronary sinuses.

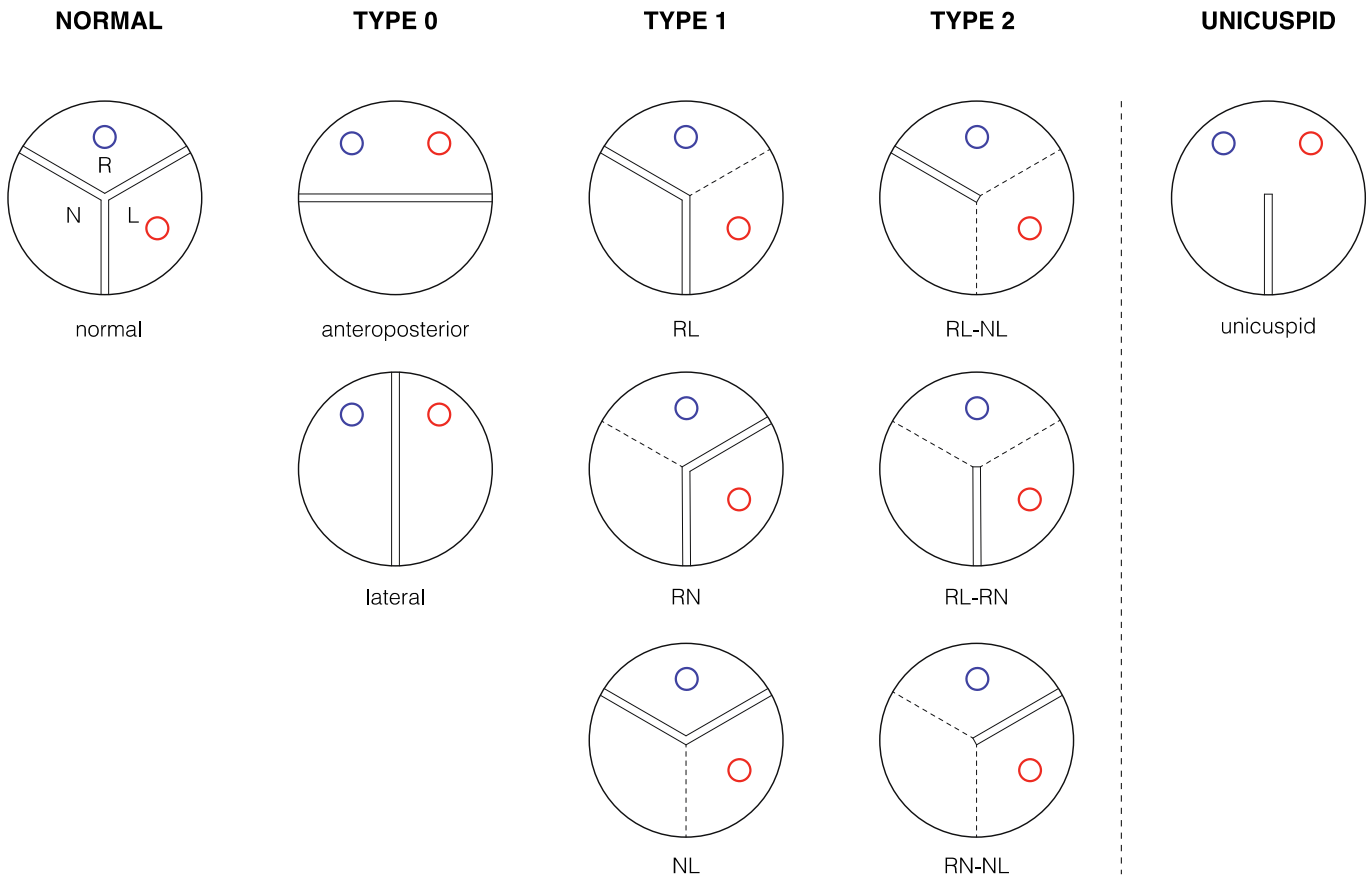

**SIGNATURES:** ○ Left coronary artery ostium ○ Right coronary artery ostium

**eFigure 2. Flowchart for the Identification of Newborns With BAV on Transthoracic Echocardiography**

AV: aortic valve.

**Transthoracic echocardiography (n=25,556)**

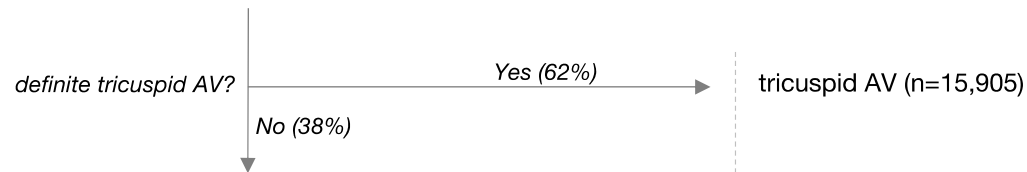

**review by specialist (n=9,651)**

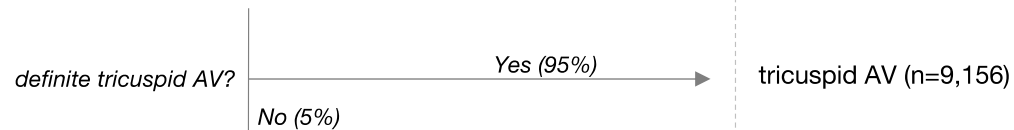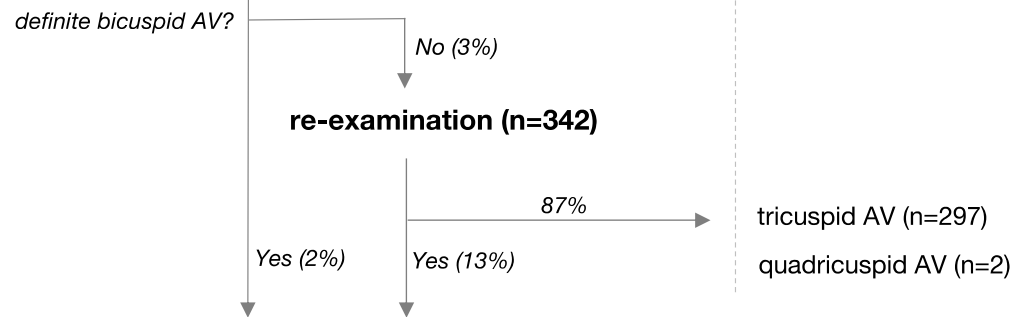

**Bicuspid aortic valve diagnosed (n=196)**

**eFigure 3. Overlapping Kernel Density Plots for the BAV (Red Line) and Control (Black Line) Groups**

A. Peak velocity across the aortic valve. B. Descending aortic peak flow velocity. C. Sinuses of Valsalva. D. Ascending aorta 1 cm from the aortic valve.

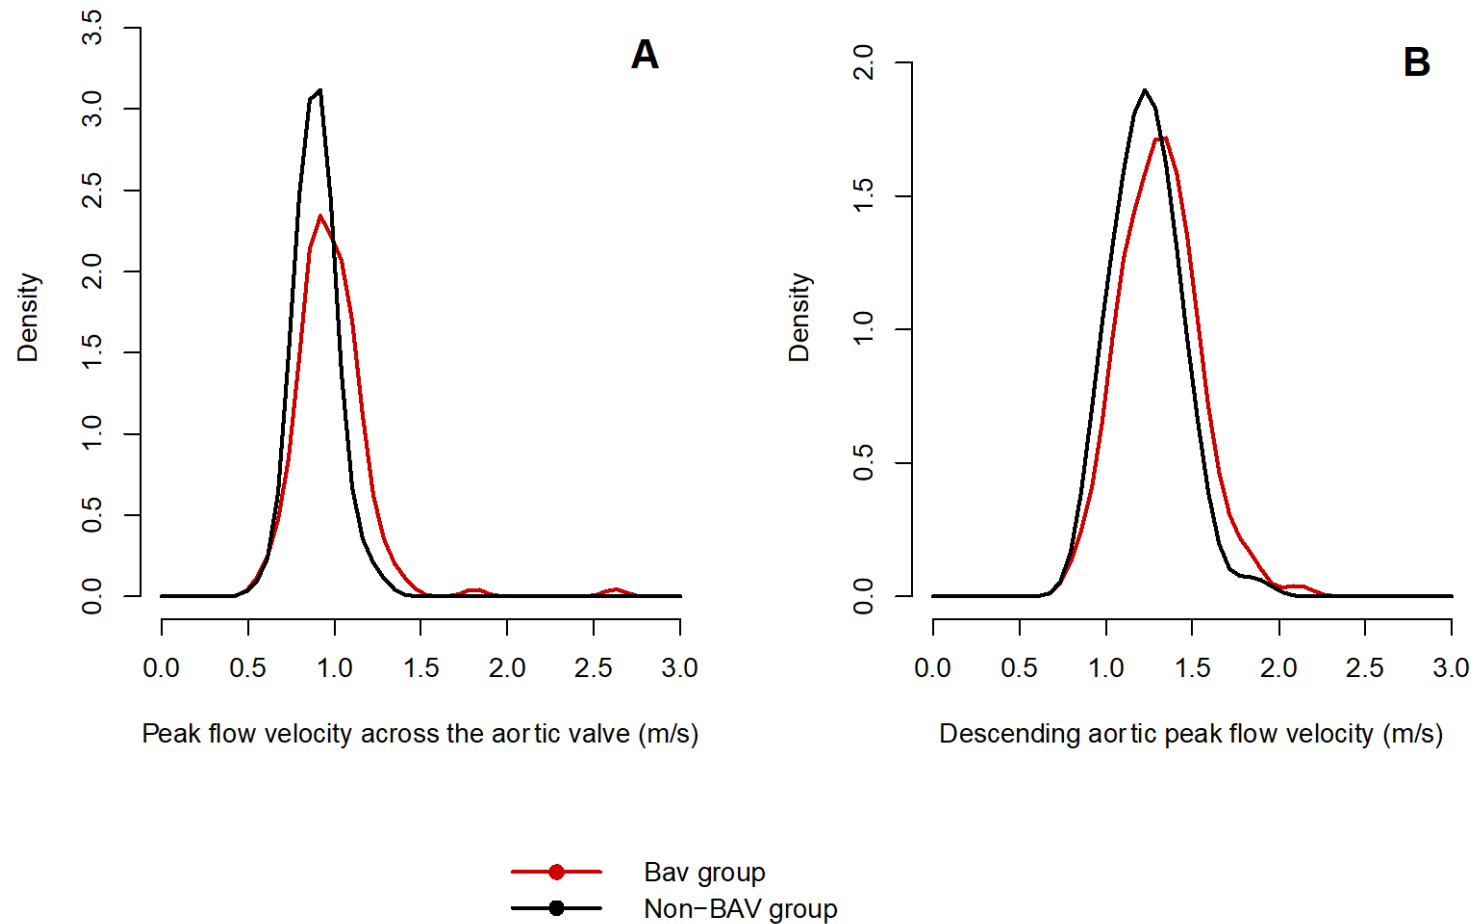

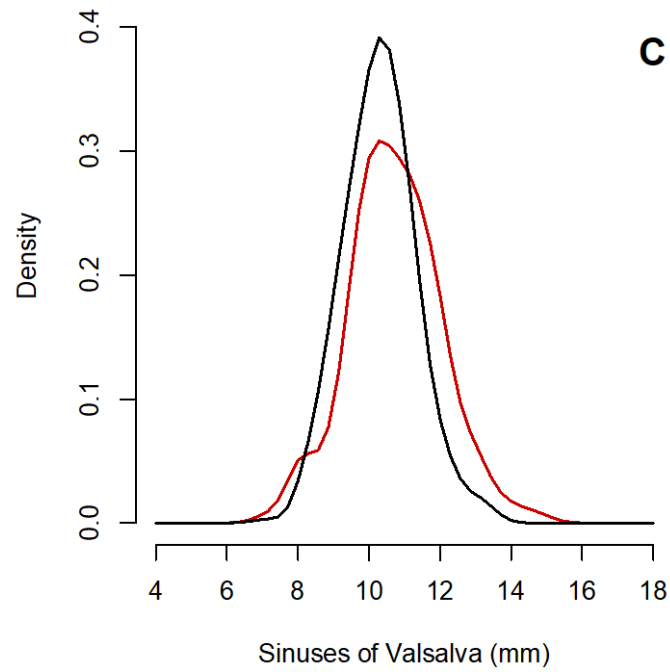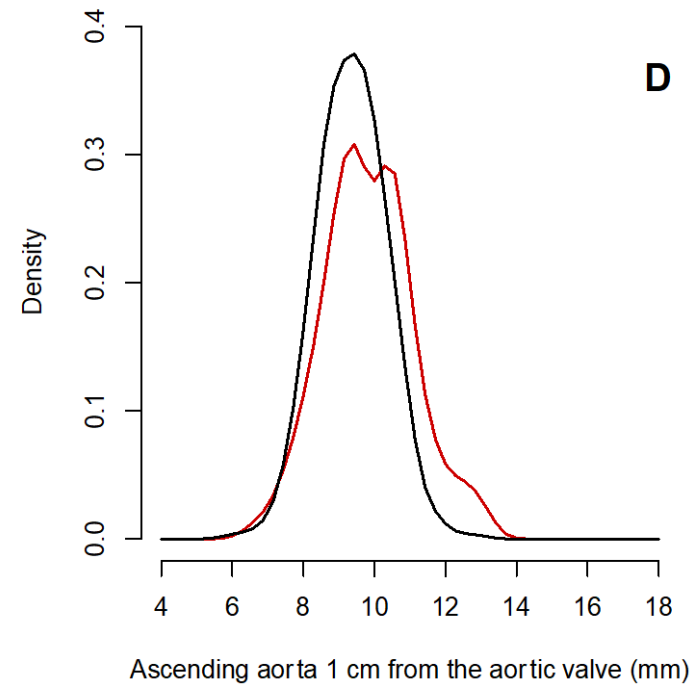

—●— Bav group  
—●— Non-BAV group



**eFigure 4. Z scores for Ascending Aortic Dimensions and Main Pulmonary Artery Diameter in Newborns With BAV According to the Pediatric Heart Network Normal Echocardiogram Database**

Each dot represents the measurement at a given point in each newborn with BAV. Horizontal lines and error bars represent mean and standard deviations for each measurement.

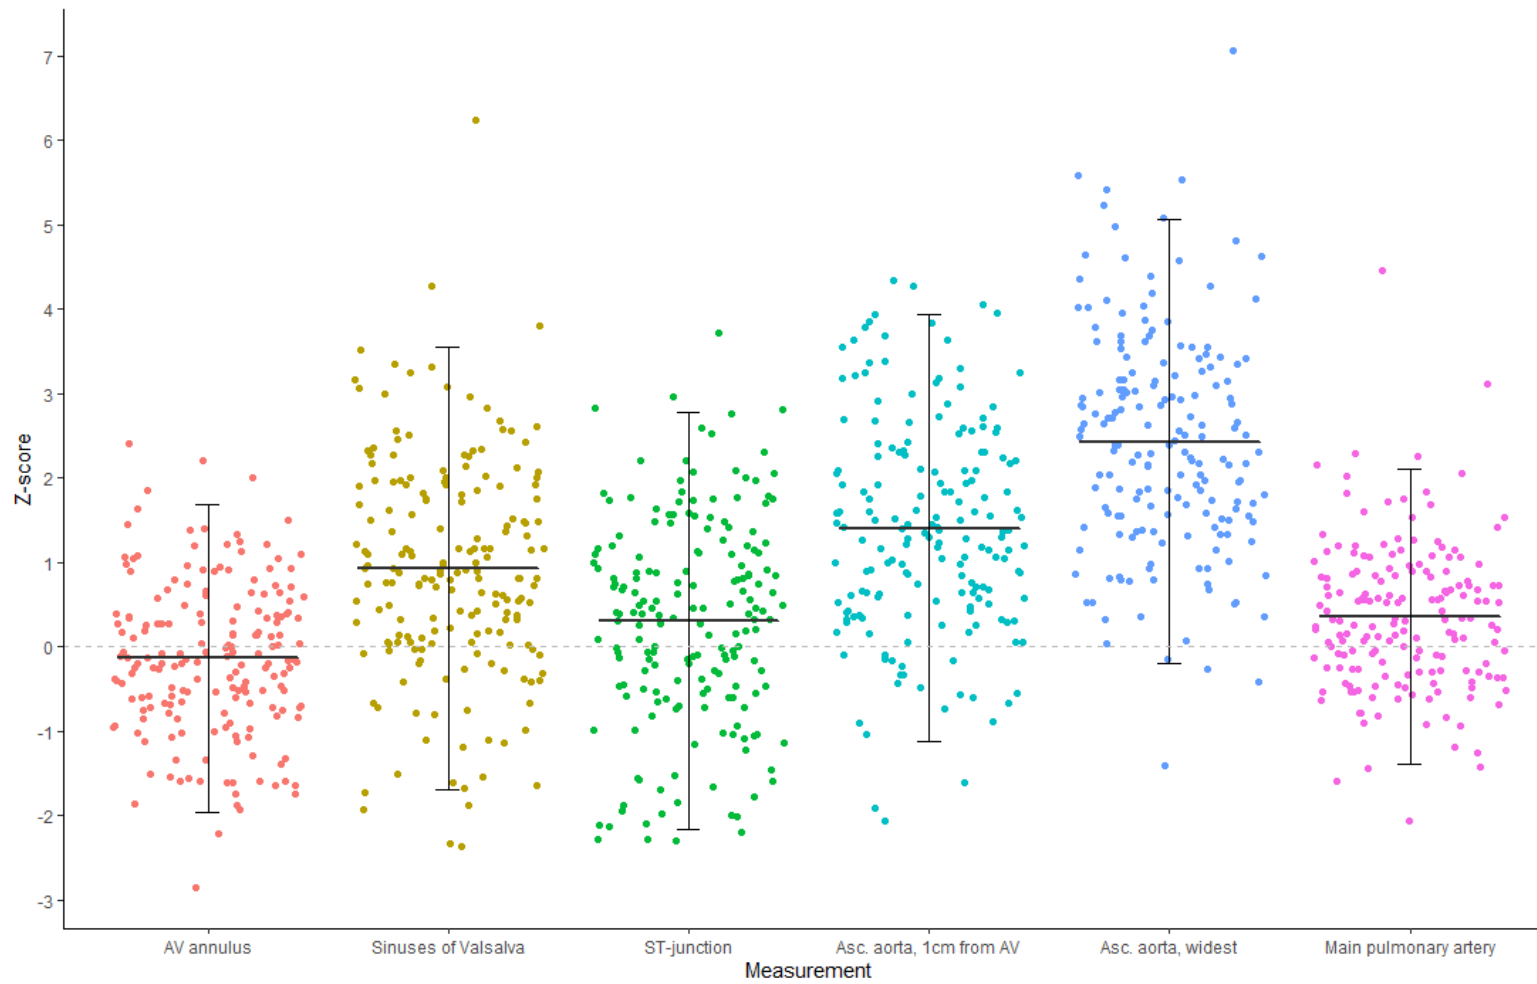

**eFigure 5. Scatter Plots Displaying Ascending Aortic Diameter Expressed as Z score and the Peak Flow Velocity Across the Aortic Valve for Newborns in the BAV Group**

A. Sinuses of Valsalva, B. Tubular Ascending Aorta 1 cm From the Aortic Valve, and C. Tubular Ascending Aorta at Widest Part Visualized

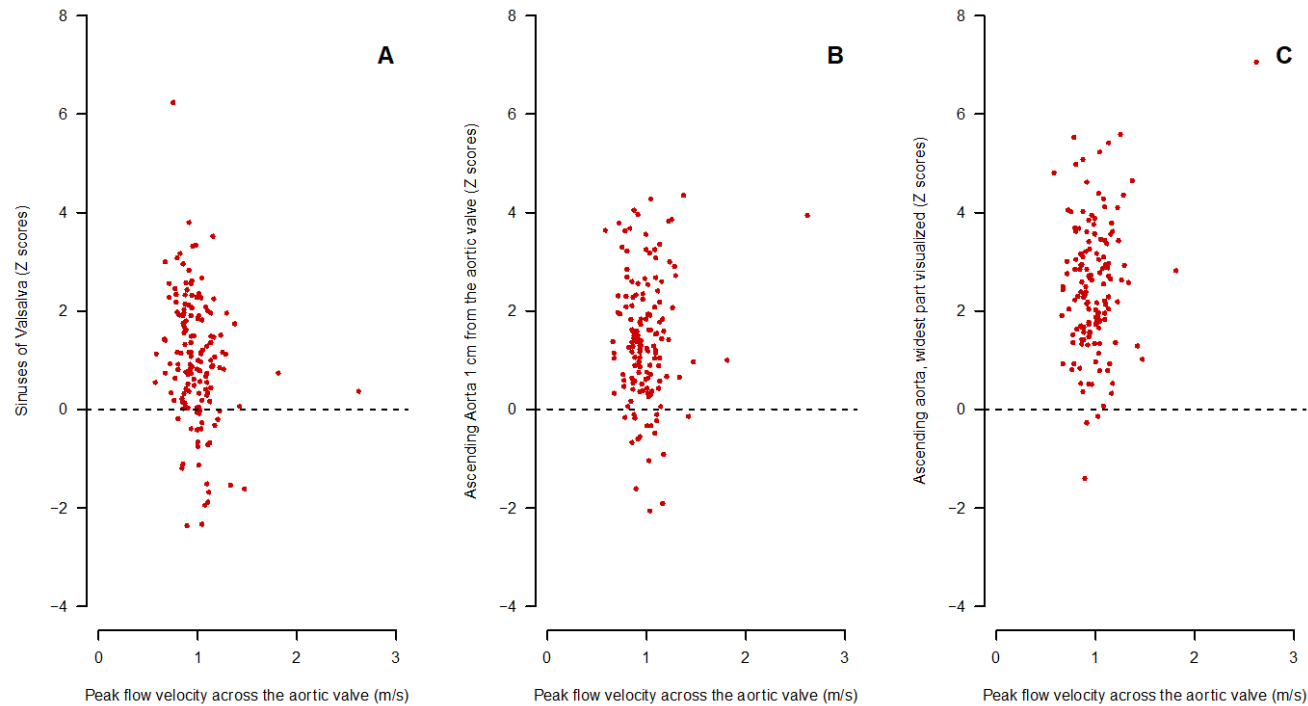

**eReferences**

1. Sievers H-H, Schmidtke C. A classification system for the bicuspid aortic valve from 304 surgical specimens. *J Thorac Cardiovasc Surg.* 2007;133(5):1226–33.
